# Supplementary material for: An artificial neural network model to predict structure-based protein–protein free energy of binding from Rosetta-calculated properties
Source: Royal Society of Chemistry journal article supplement (doi:10.1039/d2cp05644e), 2023-01-01
Supplement: d2cp05644e1.pdf [file d2cp05644e1.pdf]

# Supporting Information:

## Artificial Neural Network to Predict Structure-based Protein-protein Free Energy of Binding from Rosetta-calculated Properties

Matheus V. F. Ferraz,<sup>†,‡,¶</sup> José C.S. Neto,<sup>§</sup> Roberto D. Lins,<sup>†,‡</sup> and Erico S.  
Teixeira<sup>\*,§</sup>

<sup>†</sup>*Aggeu Magalhães Institute, Oswaldo Cruz Foundation, FIOCRUZ, Recife, PE, 50670-465,  
Brazil*

<sup>‡</sup>*Department of Fundamental Chemistry, Federal University of Pernambuco, UFPE, Recife,  
PE, 50740-670, Brazil*

<sup>¶</sup>*Heidelberg Institute for Theoretical Studies, HITS, Heidelberg, 69118, Heidelberg, Germany*

<sup>§</sup>*Recife Center for Advanced Studies and Systems, CESAR, Recife, PE, 50040-220, Brazil*

E-mail: est@cesar.school

## Content

|                                                                                                                                                   |   |
|---------------------------------------------------------------------------------------------------------------------------------------------------|---|
| Rosetta parsed command lines . . . . .                                                                                                            | 3 |
| Rosetta scripts in XML format . . . . .                                                                                                           | 3 |
| Polar atom definition . . . . .                                                                                                                   | 4 |
| Table S1. Calculated $R_{Pearson}$ in ascending order for the correlation between the<br>features value and the experimental $\Delta G$ . . . . . | 5 |

|                                                                                                                                                                                                                                                    |    |
|----------------------------------------------------------------------------------------------------------------------------------------------------------------------------------------------------------------------------------------------------|----|
| Table S2. Comparison of the predicted $\Delta G$ of binding using the ANN and experimental $\Delta G$ of binding for the 19 cases of the metadynamics-validation set. . . . .                                                                      | 7  |
| Table S3. Calculated Rosetta folding and interface properties. Short description of the features based on the Rosetta package energy function. Only features representing energetic and/or geometric terms were considered. . . . .                | 8  |
| Table S4. Codes of the PDB used for the test set along with its binding affinity in kcal.mol <sup>-1</sup> . Binding affinities were retrieved from the PDBind data set in form of $k_D$ and converted using thermodynamic relationships . . . . . | 10 |
| Figure S1. Histogram containing all the standardized range value for all features without outliers . . . . .                                                                                                                                       | 11 |
| Figure S2. Correlation between the predicted and experimental $\Delta G$ of binding for the separated training sets using the ANN and PRODIGY methods . . . . .                                                                                    | 12 |
| Figure S3. Feature importance score for all the features . . . . .                                                                                                                                                                                 | 13 |
| Figure S4. Histogram containing all the original range value for all features . . . . .                                                                                                                                                            | 14 |
| Figure S5. Histogram containing all the standardized range value for all features . . . . .                                                                                                                                                        | 15 |
| Figure S6. Evaluation of the number of epochs as a function of the root mean square error for a $k$ -fold training where $k \in \{1, \dots, 10\}$ . . . . .                                                                                        | 16 |
| References . . . . .                                                                                                                                                                                                                               | 18 |

## Rosetta parsed command lines

### Energy minimization:

```
$ ./minimize.macosclangrelease -l [list-of-pdbs] -min_all_jumps true -run::min_type lbfgs_armijo  
_nonmonotone -use_input_sc true -ex1 -ex2 -extrachi_cutoff 1 -no_his_his_pairE true -no_optH  
false -ignore_unrecognized_res -ndruns 5
```

### Properties calculations:

```
$ ./rosetta_scripts.macosclangrelease -l [list-of-minimized-pdb] -parser:protocol interface_analysis.xml  
-ignore_unrecognized_res -no_his_his_pairE -out:file:score_only ifa.sc -no_optH false -ex1 -ex2  
-use_input_sc -run::min_type lbfgs_armijo_nonmonotone -extrachi_cutoff 1 -linmem_ig 10 -  
atomic_burial_cutoff 0.01 -sasa_calculator_probe_radius 1.2
```

## Rosetta scripts in XML format

### XML to calculate interface properites (interface\_analysis.xml)

```
< ROSETTASCRIPTS >  
< SCOREFXNS >  
< ScoreFunctionname = "ref2015" weights = "ref2015" / >  
< /SCOREFXNS >  
< FILTERS >  
< ShapeComplementarityname = "Sc" min_sc = "2.0" write_int_area = "1" jump =  
"1" confidence = "0" / >  
< Ddgname = "ddg" scorefxn = "ref2015" threshold = "0" jump = "1" repeats =  
"5" repack = "1" repack_bound = "0" confidence = "0" / >  
< /FILTERS >  
< MOVERS >  
< InterfaceAnalyzerMovername = "ifa" scorefxn = "ref2015" pack_separated =  
"1" pack_input = "1" tracer = "0" interface_sc = "1" interface = "A_B" / >
```

```
< /MOVERS >  
< PROTOCOLS >  
< Addmover = "ifa" / >  
< Addfilter = "Sc" / >  
< Addfilter = "ddg" / >  
< /PROTOCOLS >  
< /ROSETTASCRIPTS >
```

## **Polar atom definition**

The SASA for a polar atom is calculated as the sum of the SASA for that specific atom and the SASA for any bound hydrogen. Polar atoms presenting SASA smaller than  $0.1 \text{ \AA}^2$  are considered buried. Hydrogen bonds between the donor and acceptors atoms with a SASA smaller than  $3.0 \text{ \AA}^2$  are considered buried. Atomic radii from the Reduce software (1) and a water probe radius of  $1.2 \text{ \AA}^2$  were employed to map buried polar atoms and hydrogen bonds. These values were reasoned by probability distributions of hydration water molecules around polar atoms from data collection of high-resolution PDB structures.(2)

**Table S1.** Calculated  $R_{Pearson}$  in ascending order for the correlation between the features value and the experimental  $\Delta G$

| <b>Feature</b>     | $R_{Pearson}$ |
|--------------------|---------------|
| dslf_fa13          | 0.336668      |
| hbond_bb_sc        | 0.252102      |
| hbond_lr_bb        | 0.215789      |
| p_aa_pp            | 0.210008      |
| lk_ball_wtd        | 0.113917      |
| hbond_sc           | 0.111662      |
| fa_atr             | 0.109970      |
| fa_elec            | 0.101131      |
| complex_normalized | 0.055793      |
| total_score        | 0.047824      |
| side1_score        | 0.046541      |
| omega              | 0.031989      |
| side2_score        | 0.029075      |
| fa_rep             | 0.022766      |
| sc_value           | 0.012860      |
| Sc                 | 0.004894      |
| dG_cross           | -0.033080     |
| pro_close          | -0.037478     |
| dG_separated       | -0.037859     |
| side2_normalized   | -0.048827     |
| fa_dun             | -0.053386     |
| ddg                | -0.053916     |

| <b>Feature</b>         | $R_{Pearson}$ |
|------------------------|---------------|
| per_residue_energy_int | -0.056136     |
| fa_intra_rep           | -0.056630     |
| hbond_sr_bb            | -0.056821     |
| side1_normalized       | -0.061778     |
| dG_separated/dSASAx100 | -0.064651     |
| dG_cross/dSASAx100     | -0.065108     |
| fa_intra_sol_xover4    | -0.068651     |
| hbond_E_fraction       | -0.070499     |
| rama_prepro            | -0.078543     |
| fa_sol                 | -0.096505     |
| nres_all               | -0.121934     |
| ref                    | -0.270164     |
| hbonds_int             | -0.346316     |
| delta_unsatHbonds      | -0.378498     |
| dSASA_polar            | -0.397664     |
| dSASA_hphobic          | -0.439358     |
| nres_int               | -0.451539     |
| dSASA_int              | -0.458725     |
| Sc_int_area            | -0.532643     |

Table S2. Comparison of the predicted  $\Delta G$  of binding using the ANN and experimental  $\Delta G$  of binding for the 19 cases of the metadynamics-validation set.

| PDB ID | Experimental $\Delta G$ (kcal.mol <sup>-1</sup> ) | ANN $\Delta G$ (kcal.mol <sup>-1</sup> ) |
|--------|---------------------------------------------------|------------------------------------------|
| 1ACB   | 13.76                                             | -11.254782                               |
| 1AY7   | 13.76                                             | -11.054798                               |
| 1BVN   | 15.65                                             | -11.545321                               |
| 1EMV   | 19.32                                             | -14.301220                               |
| 1FFW   | 8.33                                              | -8.465515                                |
| 1KAC   | 11.11                                             | -9.067882                                |
| 1KTZ   | 9.27                                              | -10.862952                               |
| 1QA9   | 7.16                                              | -8.139755                                |
| 1R0R   | 14.94                                             | -12.371928                               |
| 1US7   | 8.28                                              | -10.642823                               |
| 2C0L   | 9.88                                              | -12.066045                               |
| 2OOB   | 5.99                                              | -8.733976                                |
| 2PTC   | 18.75                                             | -13.219584                               |
| 2UUY   | 11.7                                              | -11.982295                               |
| 3A4S   | 7.87                                              | -8.636804                                |
| 3BZD   | 9.95                                              | -9.275232                                |
| 3F1P   | 8.3                                               | -9.549908                                |
| 3LVK   | 9.25                                              | -10.150698                               |
| 3SGB   | 15.24                                             | -11.496317                               |

**Table S3. Calculated Rosetta folding and interface properties. Short description of the features based on the Rosetta package energy function. Only features representing energetic and/or geometric terms were considered.**

| <b>Feature</b>     | <b>Description</b>                                                                             |
|--------------------|------------------------------------------------------------------------------------------------|
| dslf_fa13          | Disulfide geometry potential                                                                   |
| hbond_bb_sc        | Energy of backbone-side chain hydrogen bonding                                                 |
| hbond_lr_bb        | Energy of long-range hydrogen bonding                                                          |
| p_aa_pp            | Probability of amino acid at $\phi/\psi$                                                       |
| lk_ball_wtd        | Orientation-dependent solvation of polar atoms                                                 |
| hbond_sc           | Energy of side chain to side chain hydrogen bonding                                            |
| fa_atr             | Attractive energy between two atoms on different residues separated by a given distance        |
| fa_elec            | Coulombic potential energy for two atoms separated by a given distance                         |
| complex_normalized | Average energy of a residue in the entire complex                                              |
| total_score        | Relative folding free energy                                                                   |
| side1_score        | Folding energy of the first interface                                                          |
| omega              | Omega dihedral in the backbone                                                                 |
| side2_score        | Folding energy of the second interface                                                         |
| fa_rep             | Lennard-Jones repulsive between atoms in different residues                                    |
| Sc                 | Shape complementarity                                                                          |
| dG_cross           | Interaction energy                                                                             |
| pro_close          | Proline ring closure energy                                                                    |
| dG_separated       | Binding free energy                                                                            |
| side2_normalized   | Average per-residue energy on the second interface                                             |
| fa_dun             | Probability of a chosen rotamer is native-like conformation given backbone $\phi, \psi$ angles |
| ddg                | Change in the binding free energy                                                              |



| <b>Feature</b>         | <b>Description</b>                                                                         |
|------------------------|--------------------------------------------------------------------------------------------|
| per_residue_energy_int | Average energy of each residue at the interface                                            |
| fa_intra_rep           | Intra-residue repulsive component                                                          |
| hbond_sr_bb            | Energy of short-range hydrogen bonding                                                     |
| side1_normalized       | Average per-residue energy on the first interface                                          |
| dG_separated/dSASAx100 | Binding free energy divided by the total solvent accessible surface area multiplied by 100 |
| dG_cross/dSASAx100     | Interaction energy divided by the total solvent accessible surface area multiplied by 100  |
| fa_intra_sol_xover4    | Gaussian exclusion implicit solvation energy                                               |
| hbond_E_fraction       | Contribution of the hydrogen bonding potentials to the binding energy                      |
| rama_prepro            | Backbone torsion preference term                                                           |
| fa_sol                 | Gaussian exclusion implicit solvation energy                                               |
| nres_all               | Total number of residues                                                                   |
| ref                    | Reference energy for each amino acid relatively to unfolding.                              |
| hbonds_int             | Number of hydrogen bonds in the interface                                                  |
| delta_unsatHbonds      | Number of buried hydrogen bonds in the interface                                           |
| dSASA_polar            | Polar solvent accessible surface area                                                      |
| dSASA_hphobic          | Hydrophobic solvent accessible surface area                                                |
| nres_int               | Number of residues in the interface                                                        |
| dSASA_int              | Total solvent accessible surface area                                                      |
| Sc_int_area            | Shape complementarity divided by interface area                                            |

Table S4. Codes of the PDB used for the test set along with its binding affinity in kcal.mol<sup>-1</sup>. Binding affinities were retrieved from the PDBind data set in form of  $k_D$  and converted using thermodynamic relationships

| PDB ID | $k_D$ (kcal.mol <sup>-1</sup> ) | PDB ID | $k_D$ (kcal.mol <sup>-1</sup> ) |
|--------|---------------------------------|--------|---------------------------------|
| 2WH6   | -10.5                           | 5H3J   | -8.95                           |
| 2WP3   | -8.31                           | 5INB   | -9.42                           |
| 3V1C   | -10.25                          | 5MA4   | -14.02                          |
| 3VFN   | -9.17                           | 5NT7   | -6.78                           |
| 3WQB   | -11.92                          | 5TZP   | -10.25                          |
| 4B1Y   | -8.95                           | 5V5H   | -9.27                           |
| 4CJ0   | -9.55                           | 5XCO   | -10.97                          |
| 4CJ2   | -10.85                          | 5YWR   | -10.1                           |
| 4K5A   | -10.89                          | 6B6U   | -6.4                            |
| 4KT3   | -13.06                          | 6E3I   | -11.58                          |
| 4LZX   | -11.31                          | 6E3J   | -12.07                          |
| 4M0W   | -7.05                           | 6HER   | -10.08                          |
| 4NL9   | -9                              | 6JB2   | -8.09                           |
| 4PJ2   | -14.08                          | 6FU9   | -9.99                           |
| 4QLP   | -13.14                          | 6FUB   | -10.27                          |
| 4UYP   | -14.58                          | 6FUD   | -9.73                           |
| 4WND   | -10.2                           | 6J14   | -11.46                          |
| 4X33   | -9                              | 5IMK   | -8.27                           |
| 4YL8   | -7.18                           | 5IMM   | -11.52                          |
| 4Z99K  | -11.8                           | 5KXH   | -8.6                            |
| 5B78   | -7.8                            | 5KY4   | -7.95                           |
| 5DC4   | -10.16                          | 5KY5   | -8.32                           |
| 5DJT   | -10.59                          | 6DDM   | -12.78                          |
| 5E95   | -10.64                          | 6FG8   | -8.19                           |
| 5EP6   | -8.37                           | 6NE2   | -12.11                          |

Figure S1. Histogram containing all the standardized range value for all features without outliers

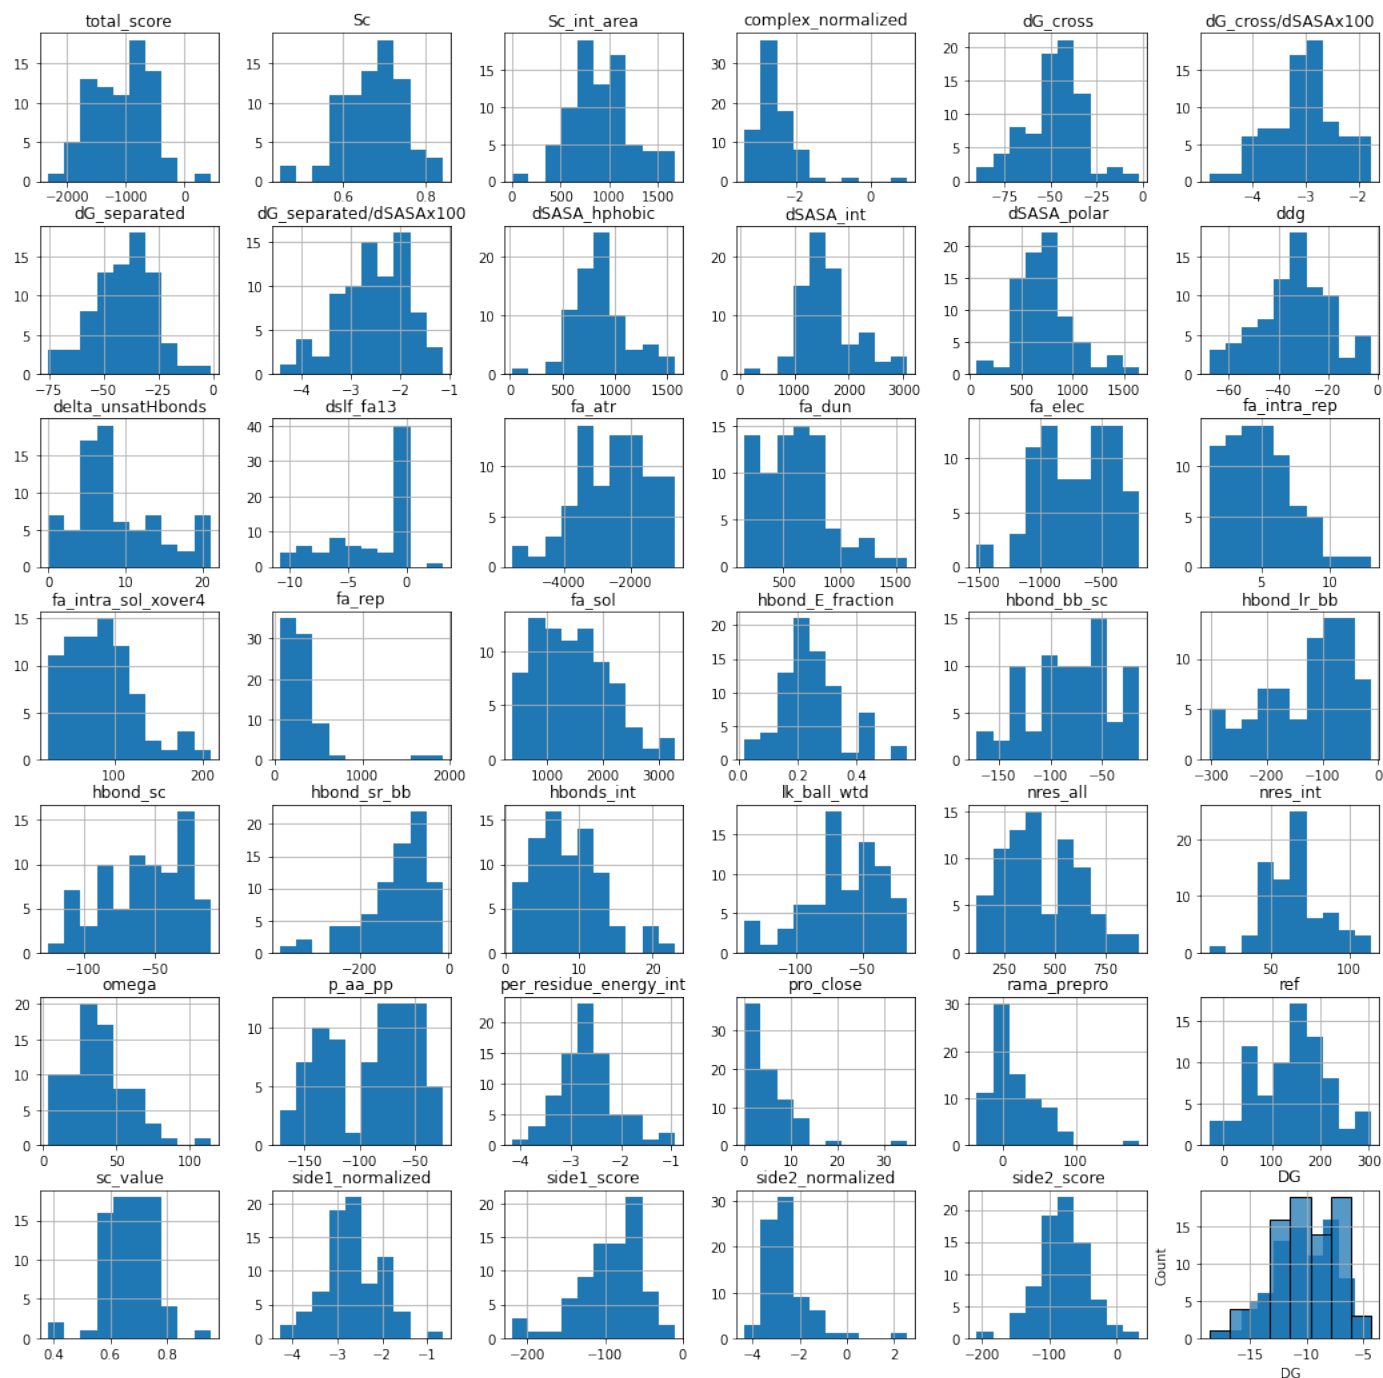

Figure S2. Correlation between the predicted and experimental  $\Delta G$  of binding for the separated training sets using the ANN and PRODIGY methods

### FULL TRAINING SET

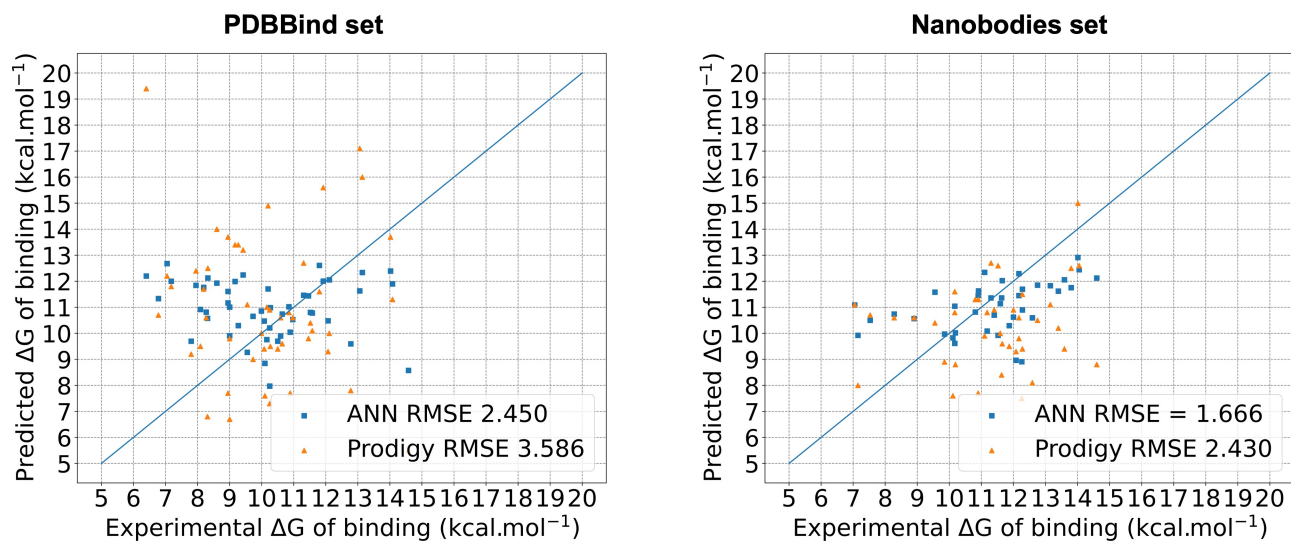

### REMOVAL OF CHALLENGING CASES

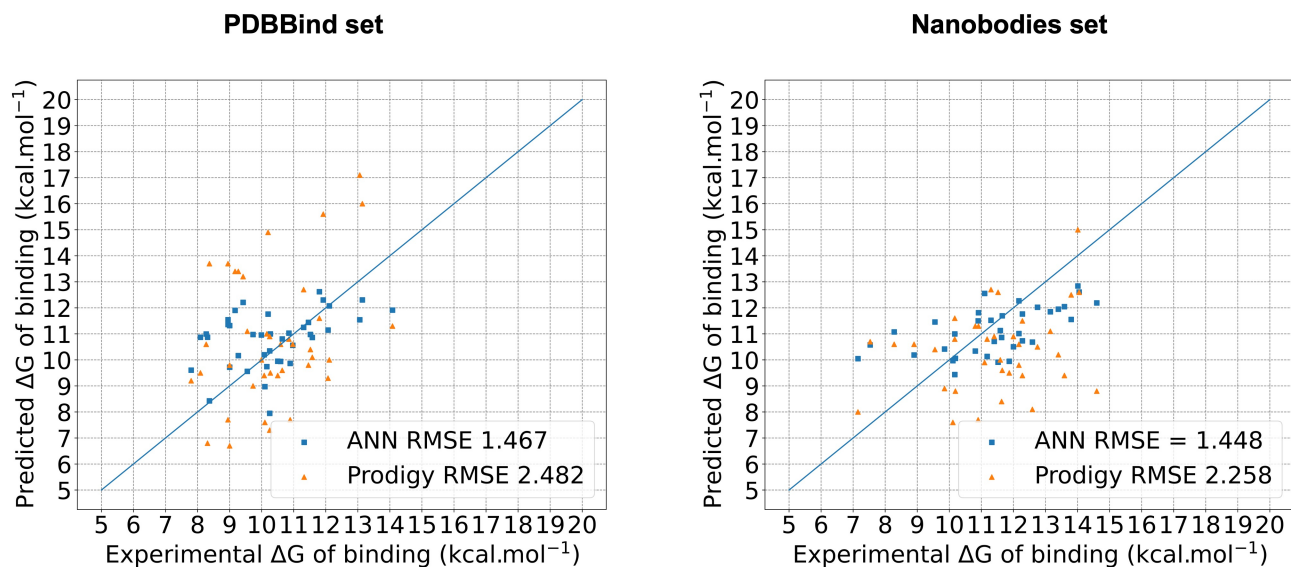

Figure S3. Feature importance score for all the features

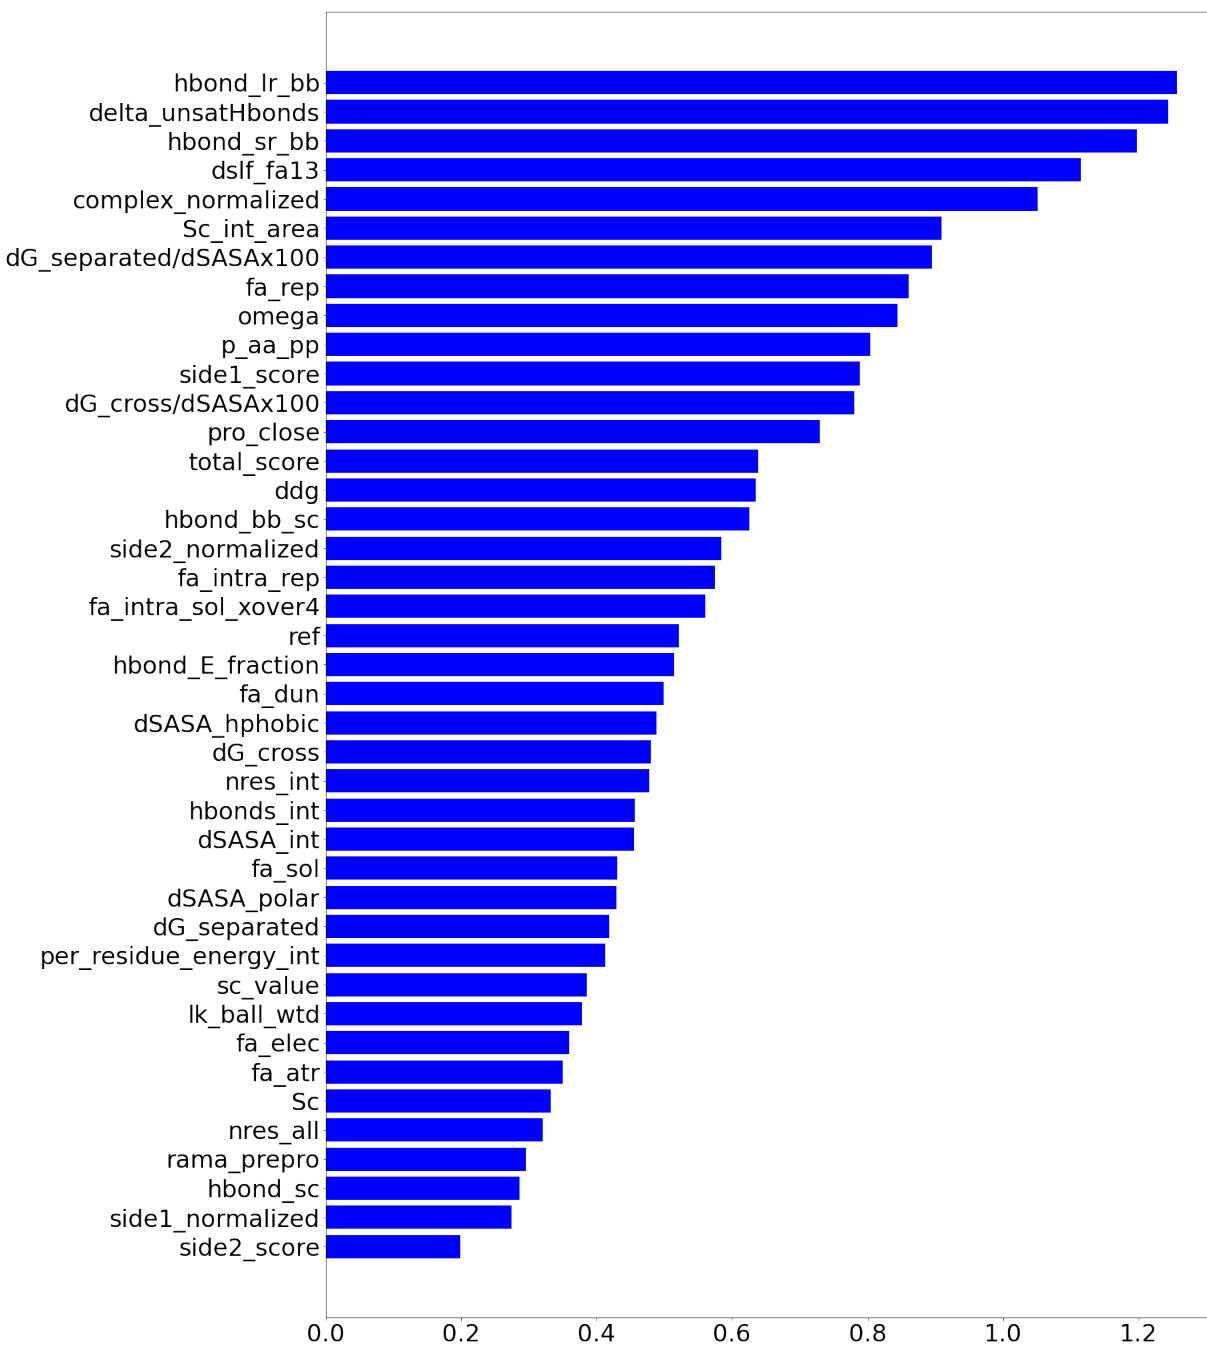

Figure S4. Histogram containing all the original range value for all features

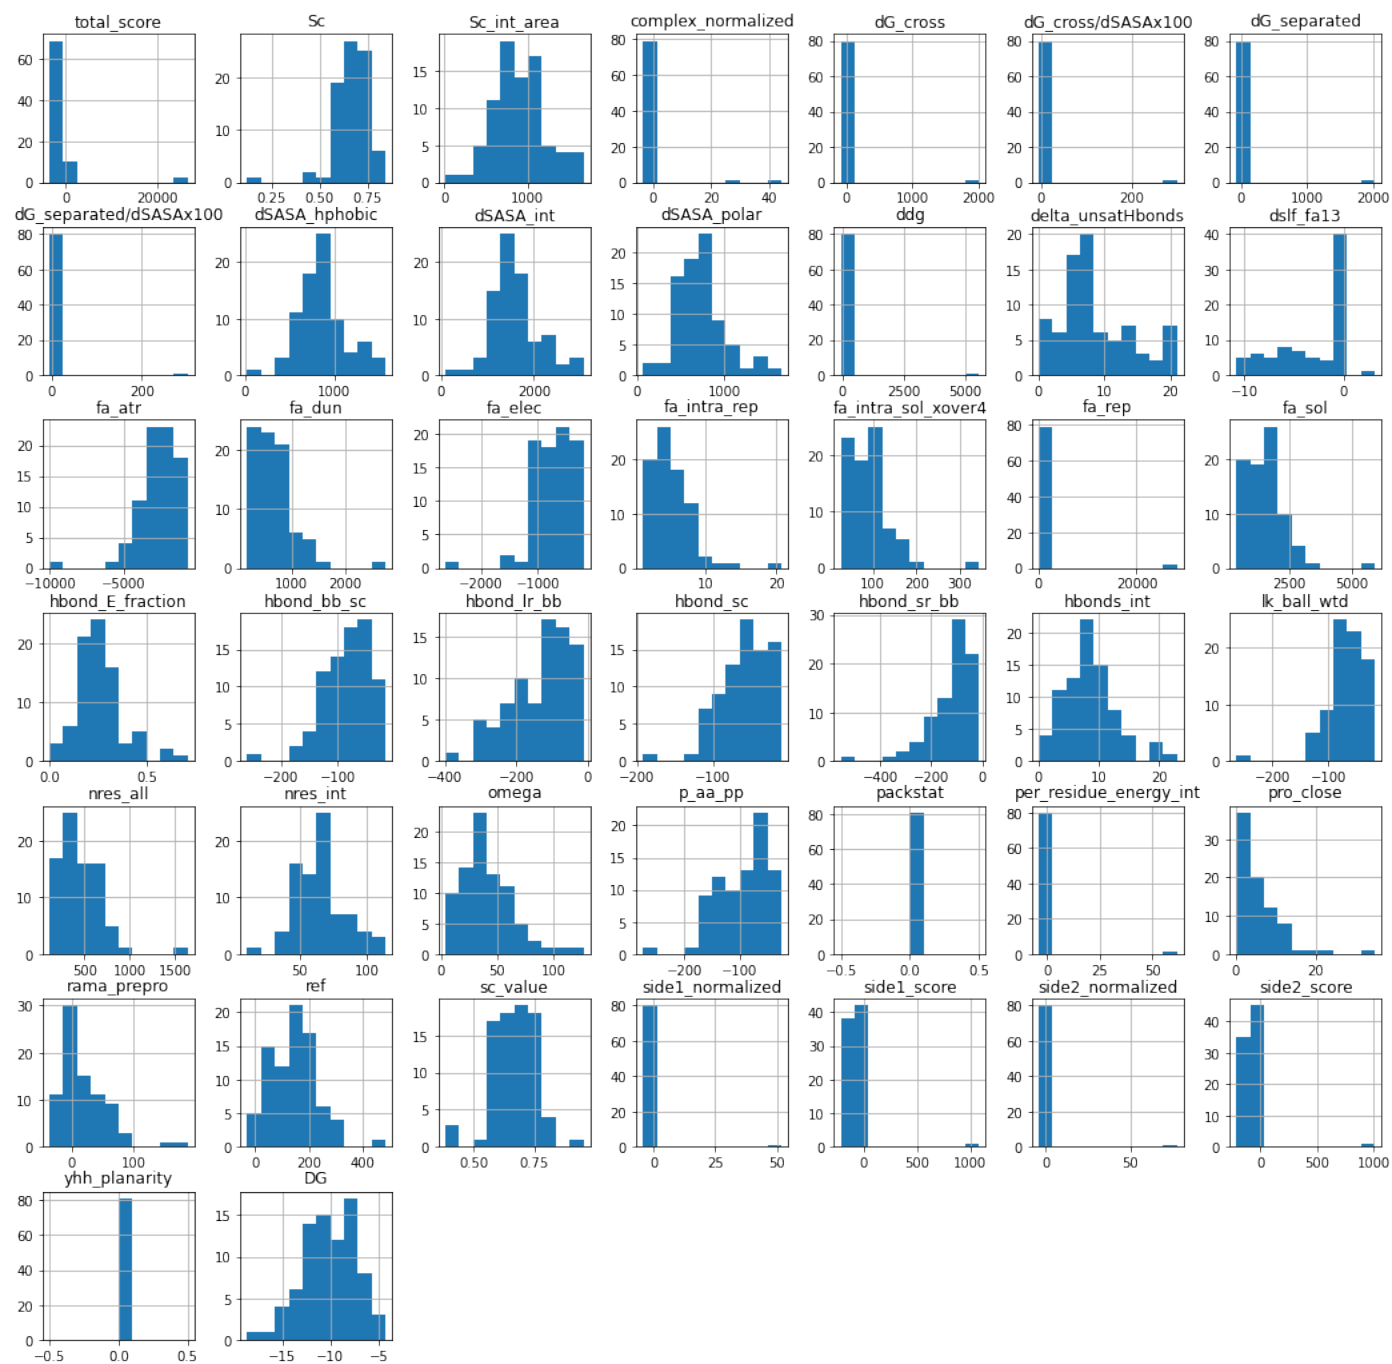

Figure S5. Histogram containing all the standardized range value for all features

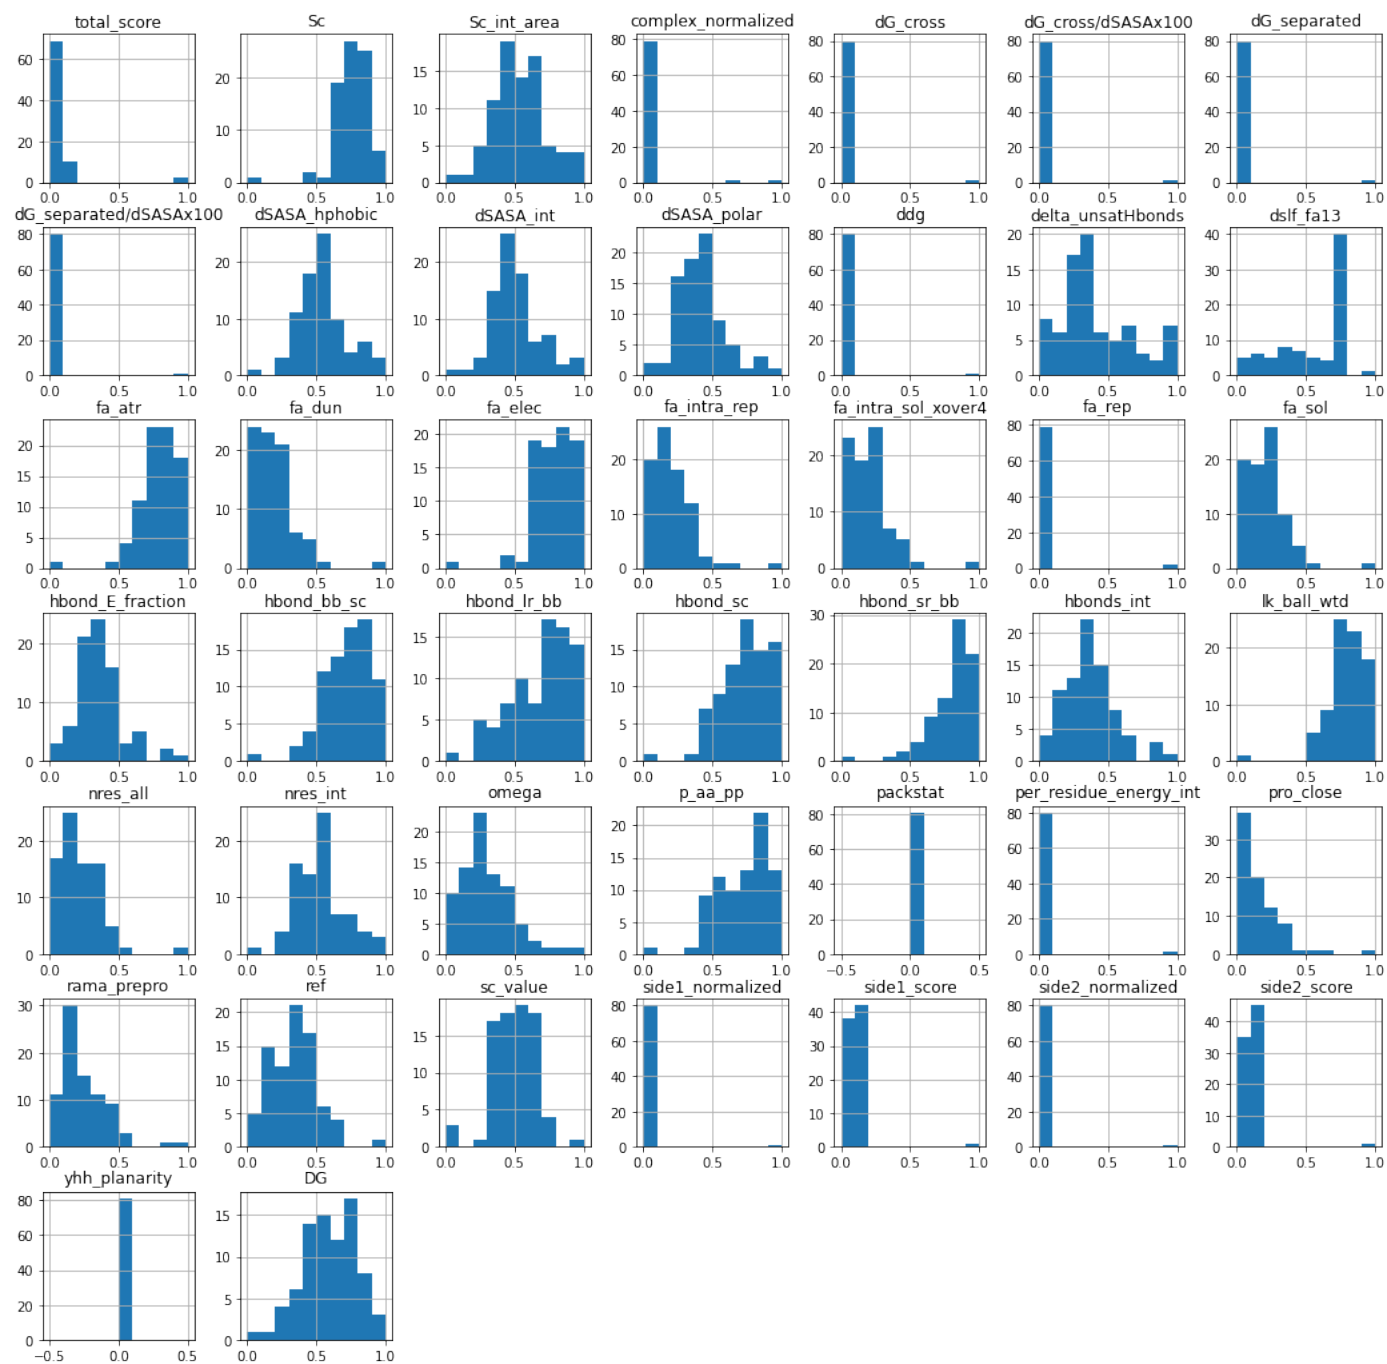

Figure S6. Evaluation of the number of epochs as a function of the root mean square error for a  $k$ -fold training where  $k \in \{1, \dots, 10\}$

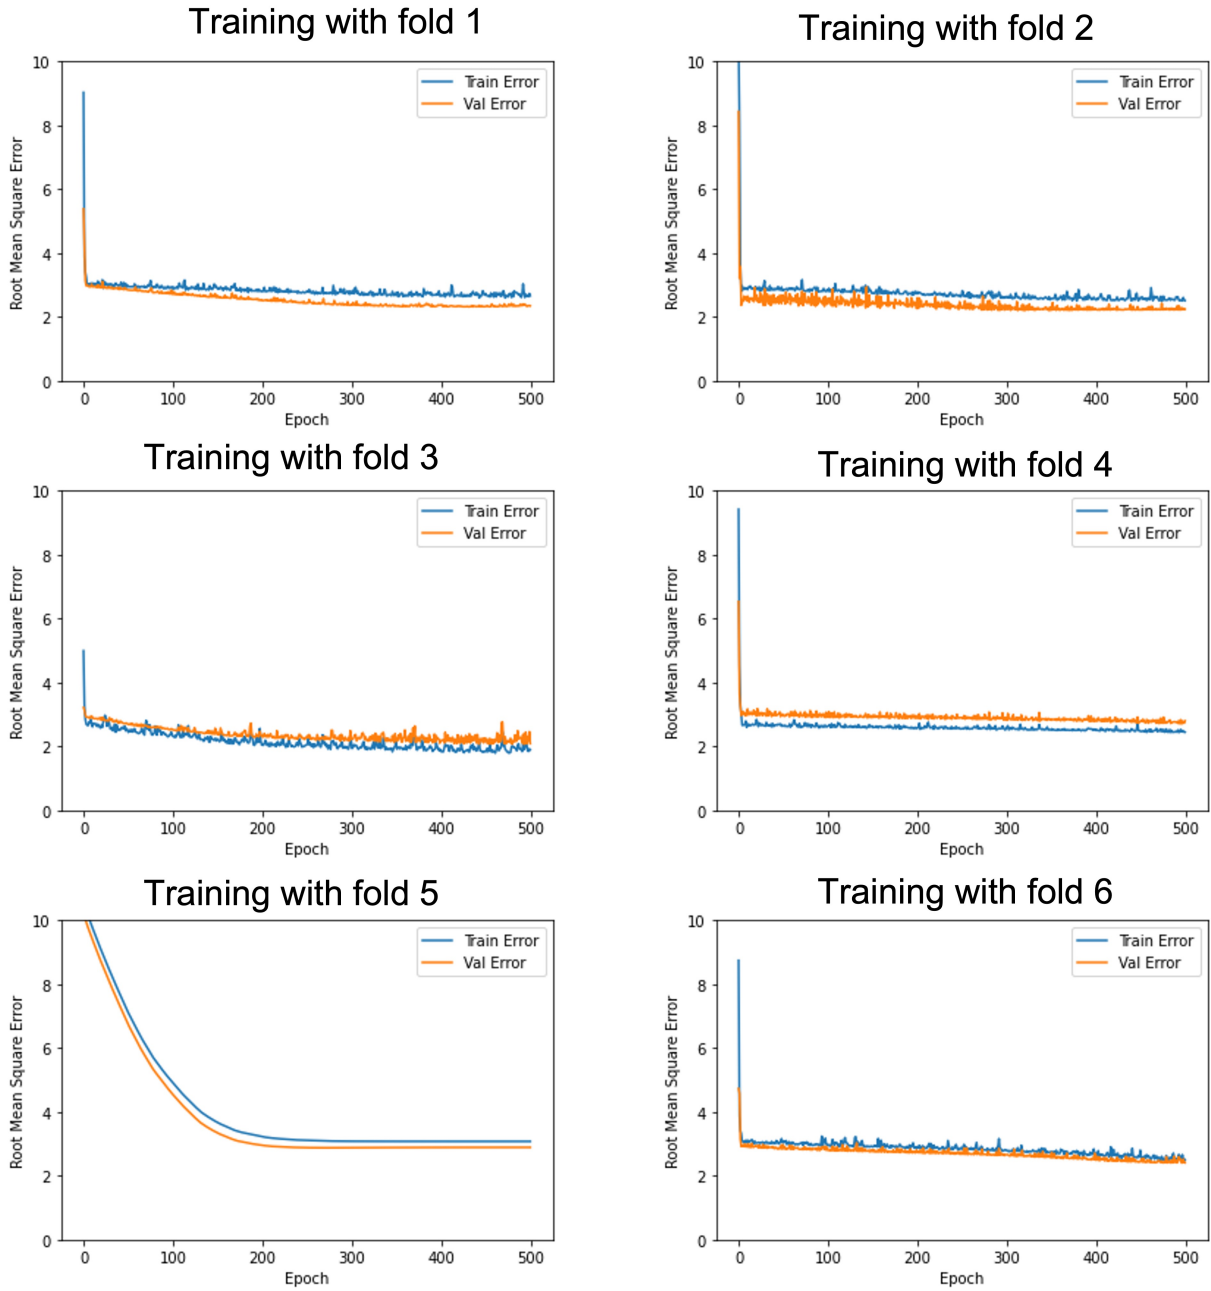



Training with fold 7

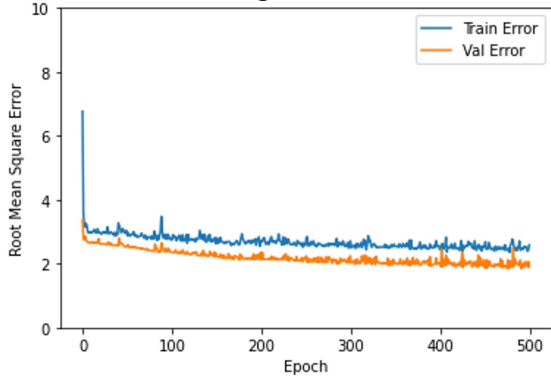

Training with fold 8

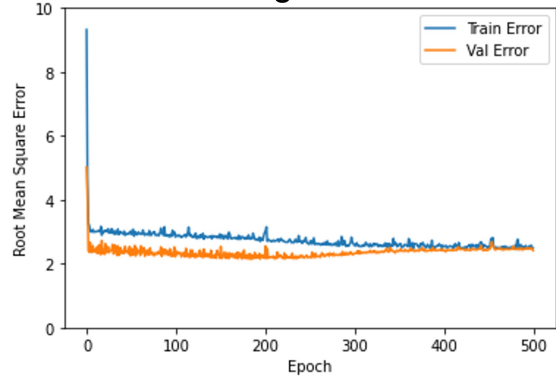

Training with fold 9

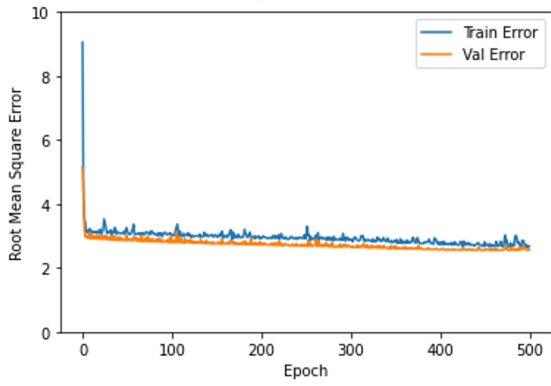

Training with fold 10

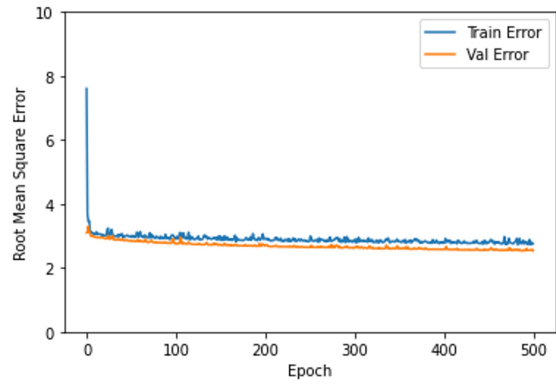

## References

- (1) Word, J. M.; Lovell, S. C.; Richardson, J. S.; Richardson, D. C. Asparagine and glutamine: using hydrogen atom contacts in the choice of side-chain amide orientation. *Journal of molecular biology* 1999, 285, 1735–1747.
- (2) Matsuoka, D.; Nakasako, M. Probability distributions of hydration water molecules around polar protein atoms obtained by a database analysis. *The Journal of Physical Chemistry B* 2009, 113, 11274–11292.
